# Supplementary material for: Omics-based approaches for discovering active ingredients and regulating gut microbiota of Actinidia arguta exosome-like nanoparticles
Source: Royal Society of Chemistry journal article supplement (doi:10.1039/d3fo05783f), 2024-01-01
Supplement: d3fo05783f1.pdf [file d3fo05783f1.pdf]

564

Table S1 A part known miRNAs of AAELNs

| miRBase precursor id | Total read count | Sequence (5'–3')       | Length | Family    |
|----------------------|------------------|------------------------|--------|-----------|
| ade-miRNA-319g-pre   | 460              | uuggacugaaggagcuccu    | 21     | miRNA-319 |
| ade-miRNA-396j-pre   | 395              | uuccacagcuuucuugaacu   | 21     | miRNA-396 |
| ade-miRNA-166e-pre   | 136              | ucggaccaggcucauucucc   | 21     | miRNA-166 |
| ade-miRNA-164c-pre   | 5                | uggagaagcagggcagugca   | 21     | miRNA-164 |
| ade-miRNA-395a-pre   | 4                | cugaaguguuuggggaacuc   | 21     | miRNA-395 |
| ade-miRNA-168d-pre   | 50               | cccgccuugcaucaacugaau  | 21     | miRNA-168 |
| ade-miRNA-530d-pre   | 6                | ugcauuugcaccugcaccua   | 21     | miRNA-530 |
| ade-miRNA-535c-pre   | 12               | ugacaacgagagagcacgc    | 21     | miRNA-535 |
| ade-miRNA-159b-pre   | 162              | uuuggauugaaggagcucu    | 20     | miRNA-159 |
| ade-miRNA-162a-pre   | 100              | uugccaagcccacccaugccua | 21     | miRNA-162 |
| ade-miRNA-403c-pre   | 67               | uuagauucacgcacaacucug  | 22     | miRNA-403 |
| ade-miRNA-398a-pre   | 8                | ggagugacacuagaacacaug  | 22     | miRNA-398 |

565

566

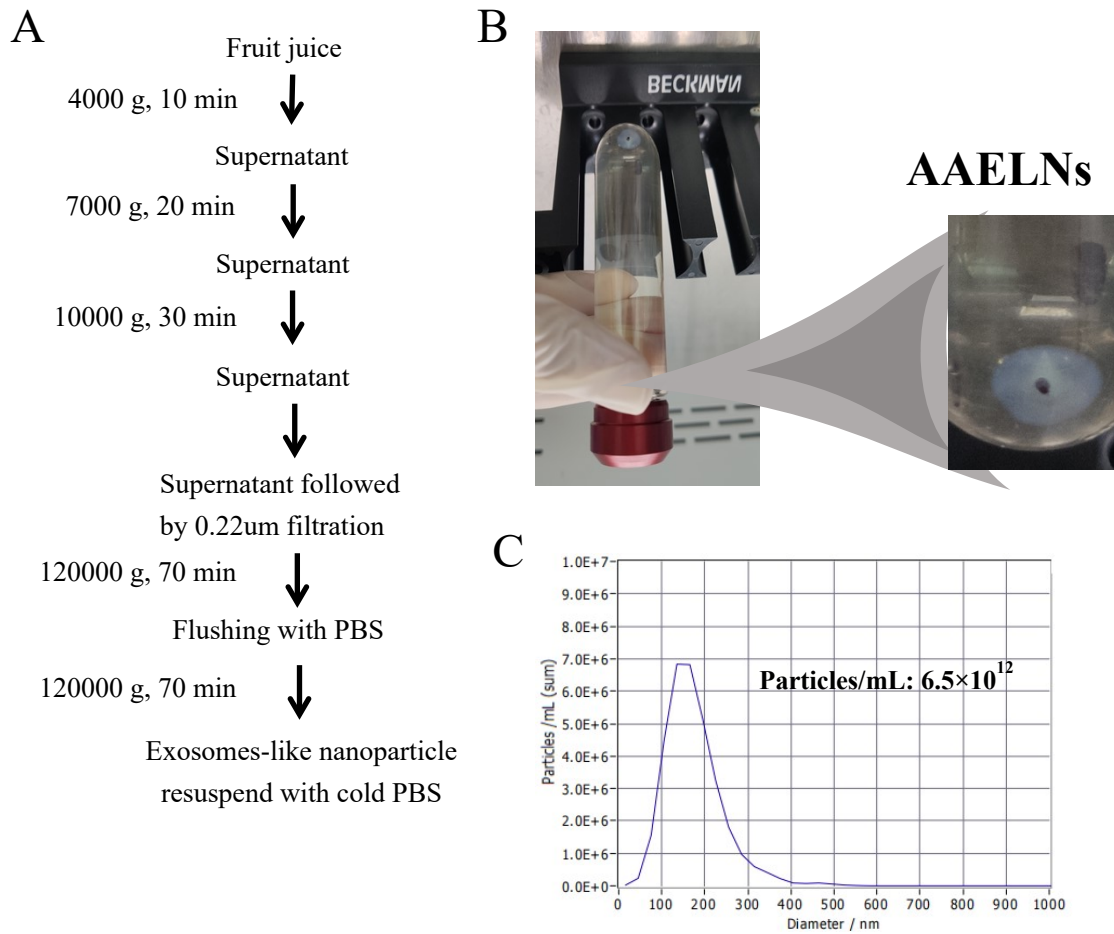

567

568 Fig. S1 (A) Flowchart of AAELNs extraction. (B) AAELNs are precipitated at the  
 569 bottom of the centrifuge tube after ultrahigh speed centrifugation. (C) Particles number  
 570 of AAELNs.

571

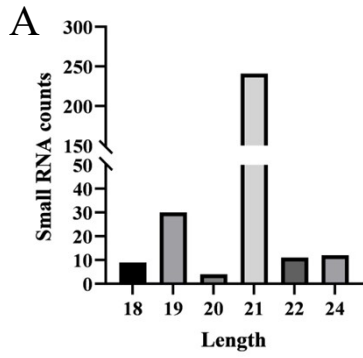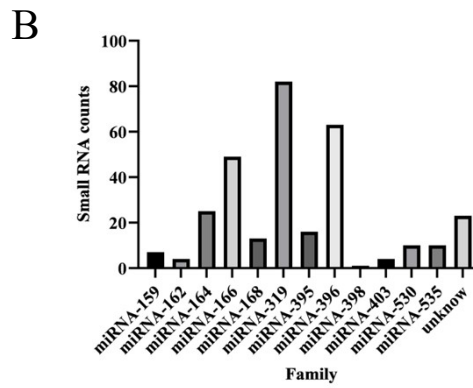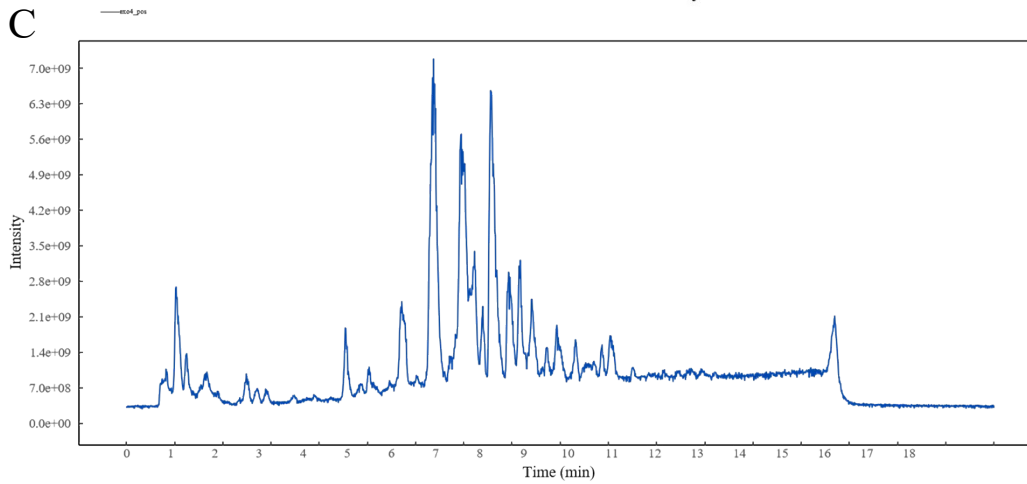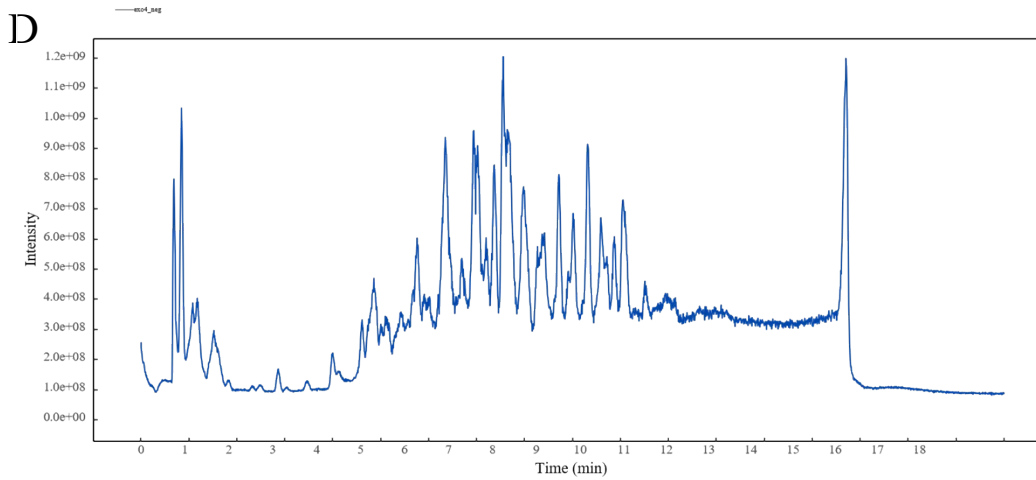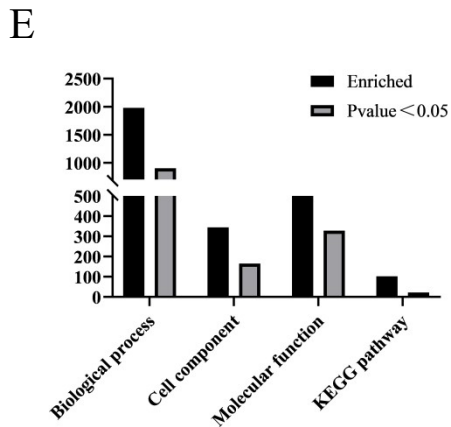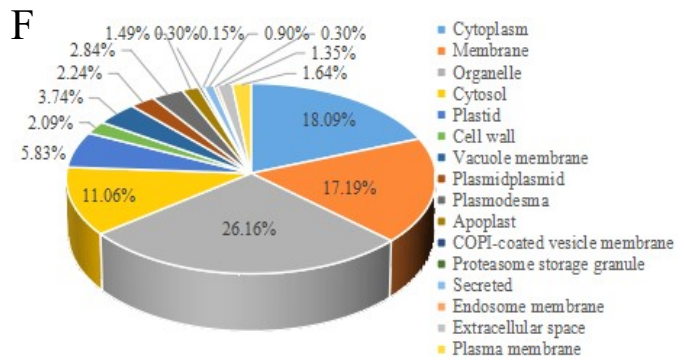

573 Fig. S2 (A) Expression of small RNA length distribution, (B) The distribution of small  
574 RNA families expressed. (C) Total ionization current chromatograms of AAELNs in  
575 positive ion mode and (D) negative ion mode. (E) BP/CC/MF/KEGG pathway protein  
576 enrichment statistics, (F) Subcellular localization of AAELNs-proteins.  
577
